# Supplementary material
Source: PubMed Central journal article supplement (PMC3406847)
Supplement: 1203647109_pnas.201203647SI.pdf [file 1203647109_pnas.201203647SI.pdf]

# Supporting Information

## Kathage and Qaim 10.1073/pnas.1203647109

**Table S1. Descriptive statistics for 1,655 plots and 533 associated households (averages for 2002–2004 and 2006–2008)**

| Plot or household information      | 2002–2004          |                    | 2006–2008          |                    |
|------------------------------------|--------------------|--------------------|--------------------|--------------------|
|                                    | Conventional       | Bt                 | Conventional       | Bt                 |
| <b>Plot level information</b>      |                    |                    |                    |                    |
| Seed cost (1,000 Rs/acre)          | 0.51 (0.26)        | 1.60*** (0.43)     | 0.47 (0.21)        | 0.91*** (0.32)     |
| Seed rate (g/acre)                 | 659.82*** (552.39) | 490.72 (114.23)    | 646.64*** (474.33) | 570.75 (160.93)    |
| Irrigation (share of plots)        | 0.46 (0.50)        | 0.58*** (0.49)     | 0.48 (0.50)        | 0.59* (0.49)       |
| Fertilizer (t/acre)                | 0.23 (0.15)        | 0.26*** (0.16)     | 0.20 (0.10)        | 0.25*** (0.15)     |
| Pesticide (1,000 Rs/acre)          | 2.27*** (1.80)     | 1.43 (1.57)        | 1.07 (1.21)        | 1.07 (1.38)        |
| Labor (d/acre)                     | 70.72 (32.30)      | 83.23*** (40.81)   | 63.12 (35.74)      | 69.75 (44.67)      |
| Yield (kg/acre)                    | 520.64 (315.54)    | 705.40*** (360.41) | 588.85 (318.66)    | 829.03*** (341.08) |
| Cotton price (Rs/kg)               | 19.67 (3.06)       | 19.52 (2.69)       | 20.07 (4.87)       | 23.31*** (4.05)    |
| Revenue (1,000 Rs/acre)            | 10.22 (6.36)       | 13.79*** (7.32)    | 12.41 (7.48)       | 19.35*** (8.42)    |
| Total cost (1,000 Rs/acre)         | 6.62 (3.07)        | 7.65*** (2.94)     | 7.10 (3.34)        | 9.03*** (5.12)     |
| Profit (1,000 Rs/acre)             | 3.60 (5.80)        | 6.14*** (6.89)     | 5.31 (6.80)        | 10.32*** (7.73)    |
| No. of plots                       | 601                | 298                | 64                 | 692                |
| <b>Household level information</b> |                    |                    |                    |                    |
| Age of farmer (y)                  | 44.24 (12.49)      | 44.43 (12.47)      | 48.14** (12.52)    | 45.18 (12.67)      |
| Education of farmer (y)            | 7.29 (4.97)        | 8.04** (4.81)      | 4.73 (5.08)        | 7.32*** (5.15)     |
| Land owned (acres)                 | 13.25 (15.45)      | 15.07* (18.42)     | 11.48 (12.28)      | 11.61 (12.68)      |
| Cotton area (acres)                | 6.99 (37.12)       | 6.20 (6.73)        | 4.42 (4.51)        | 5.79** (4.60)      |
| Household size (head)              | 6.46 (3.46)        | 6.75 (3.80)        | 6.59 (3.38)        | 6.28 (4.07)        |
| Expenditures (1,000 Rs/y)          | 85.87 (71.01)      | 122.76*** (79.00)  | 87.90 (64.14)      | 90.43 (88.82)      |
| No. of households                  | 363                | 222                | 61                 | 432                |

\* \*\* \*\*\* imply that the mean value is significantly higher than that of conventional/Bt in the same time period at the 10%, 5%, and 1% level, respectively. Mean values are shown with SDs in parentheses. Household expenditures were deflated using the consumer price index. Rs, Indian Rupees.

**Table S2. Estimated coefficients of quadratic production (yield) function**

| Explanatory variables            | Pooled-data model<br>1 | Fixed-effects models |                   |
|----------------------------------|------------------------|----------------------|-------------------|
|                                  |                        | 2                    | 3                 |
| <b>Inputs</b>                    |                        |                      |                   |
| Bt (dummy)                       | 156.46*** (21.85)      | 125.90*** (20.41)    | 116.91*** (20.68) |
| Bt 2006–2008 (dummy)             | 31.62 (44.79)          | 3.59 (43.46)         | 180.06*** (20.54) |
| Seed rate (g/acre)               | 0.54** (0.02)          | –0.004 (0.03)        | –0.01 (0.03)      |
| Sow date (d)                     | 0.23 (0.40)            | –0.85** (0.42)       | –0.86** (0.44)    |
| Harvest date (d)                 | 1.16*** (0.27)         | 1.03*** (0.29)       | –0.08 (0.25)      |
| Irrigation (yes/no)              | 139.75*** (15.80)      | 97.26*** (19.35)     | 83.00*** (0.00)   |
| Fertilizer (t/acre)              | 70.61 (135.43)         | 1.29 (144.01)        | –29.08 (149.13)   |
| Square of fertilizer             | 844.08** (351.59)      | 558.55 (358.62)      | 646.46* (371.64)  |
| Pesticide (1,000 Rs/acre)        | 20.62 (13.17)          | 1.72 (14.24)         | –8.91 (13.58)     |
| Square of pesticide              | –1.85 (2.91)           | –1.86 (2.94)         | –1.52 (3.03)      |
| Labor (d/acre)                   | 4.44*** (0.55)         | 5.11*** (0.69)       | 4.83*** (0.72)    |
| Square of labor                  | –0.01*** (0.003)       | –0.02*** (0.01)      | –0.01** (0.01)    |
| Fertilizer-pesticide interaction | –72.08*** (27.31)      | –35.28 (27.95)       | –38.85 (28.97)    |
| Fertilizer-labor interaction     | –1.77 (1.22)           | –2.91** (1.35)       | –3.23** (1.39)    |
| Pesticide-labor interaction      | 0.14 (0.13)            | 0.17 (0.14)          | 0.29** (0.14)     |
| <b>Household characteristics</b> |                        |                      |                   |
| Age of farmer (y)                | –2.34*** (0.65)        |                      |                   |
| Education of farmer (y)          | –0.29 (1.55)           |                      |                   |
| Cotton experience of farmer (y)  | 0.62 (0.91)            |                      |                   |
| Karnataka                        | –9.89 (20.64)          |                      |                   |
| Andhra Pradesh                   | 19.43 (20.87)          |                      |                   |
| Tamil Nadu                       | –193.54*** (40.79)     |                      |                   |
| 2004                             | 103.94*** (19.91)      | 125.39*** (17.68)    |                   |
| 2006                             | 235.41*** (41.42)      | 297.03*** (40.53)    |                   |
| 2008                             | 128.01*** (44.64)      | 208.61*** (43.68)    |                   |
| Constant                         | –130.12 (82.19)        | –104.19 (83.07)      | 287.23*** (69.10) |
| No. of observations              | 1648                   | 1648                 | 1648              |
| R <sup>2</sup>                   | 0.38                   | 0.39                 | 0.34              |
| Hausman test                     |                        | 90.47***             | 70.00***          |

\*. \*\*. \*\*\*, Coefficient is statistically significant at the 10%, 5%, and 1% level, respectively. The model in column 1 is based on comparisons of plots both within and between households. Columns 2 and 3 are based on comparisons of plots within households (household fixed effects). The dependent variable in all three models is cotton yield in kilogram per acre. Coefficient estimates are shown with SEs in parentheses. The reference year is 2002. The Hausman test results show that fixed-effects are preferred over random-effects specifications. Rs, Indian Rupees.

**Table S3. Estimated coefficients of quadratic profit function**

| Explanatory variables                  | Pooled-data model<br>1   | Fixed-effects models     |                         |
|----------------------------------------|--------------------------|--------------------------|-------------------------|
|                                        |                          | 2                        | 3                       |
| <b>Inputs</b>                          |                          |                          |                         |
| Bt (dummy)                             | 1,595.67* (847.63)       | 1,877.21** (889.16)      | 2,151.51** (893.33)     |
| Bt 2006–2008 (dummy)                   | 1,485.88 (1,087.64)      | –260.45 (1,144.58)       | 1,736.39** (803.31)     |
| Seed rate (g/acre)                     | 0.72 (0.47)              | 0.09 (0.63)              | –0.07 (0.63)            |
| Sow date (d)                           | –4.56 (8.47)             | –18.37* (9.59)           | –19.92** (9.72)         |
| Harvest date (d)                       | 14.26** (5.73)           | 13.72** (6.73)           | –2.36 (6.15)            |
| Irrigation (yes/no)                    | 2,922.27*** (318.20)     | 2,087.24*** (439.54)     | 2,027.25*** (442.23)    |
| Seed price (Rs/450 g)                  | 0.71 (0.70)              | 0.16 (0.76)              | –0.35 (0.76)            |
| Cotton price (Rs/kg)                   | 812.81*** (64.91)        | 814.17*** (71.21)        | 615.53*** (53.88)       |
| Fertilizer price (Rs/kg)               | –286.88*** (90.49)       | –361.04*** (98.40)       | –340.12*** (99.74)      |
| Square of fertilizer price             | 6.37*** (1.98)           | 8.39*** (2.21)           | 7.58*** (2.24)          |
| Pesticide price (Rs/L)                 | 0.60 (0.43)              | 0.05 (0.48)              | 0.53 (0.47)             |
| Square of pesticide price              | 0.0001 (0.0001)          | 0.0002* (0.0001)         | 0.0001 (0.0001)         |
| Wage rate (Rs/h)                       | 138.38 (136.08)          | –74.12 (152.33)          | 230.42 (145.12)         |
| Square of wage rate                    | –10.50* (6.00)           | –3.27 (9.37)             | –23.84*** (8.84)        |
| Fertilizer-pesticide price interaction | –0.10*** (0.02)          | –0.09*** (0.02)          | –0.09*** (0.02)         |
| Fertilizer-labor price interaction     | 18.45 (13.78)            | 3.20 (15.66)             | 7.45 (15.83)            |
| Pesticide-labor price interaction      | –0.01 (0.03)             | 0.02 (0.04)              | –0.00004 (0.04)         |
| <b>Household characteristics</b>       |                          |                          |                         |
| Age of farmer (y)                      | –45.37*** (13.71)        |                          |                         |
| Education of farmer (y)                | 5.43 (32.59)             |                          |                         |
| Cotton experience of farmer (y)        | 2.12 (19.25)             |                          |                         |
| Karnataka                              | 997.04** (428.77)        |                          |                         |
| Andhra Pradesh                         | –757.56* (412.86)        |                          |                         |
| Tamil Nadu                             | –2,331.92*** (825.00)    |                          |                         |
| 2004                                   | 1,454.26*** (464.90)     | 2,066.07*** (466.18)     |                         |
| 2006                                   | 2,093.82** (933.78)      | 5,006.86*** (1,017.09)   |                         |
| 2008                                   | –1,389.82 (1,064.79)     | 2,332.61** (1,149.50)    |                         |
| Constant                               | –15,530.24*** (2,276.21) | –14,554.41*** (2,268.62) | –6,492.66*** (1,676.44) |
| No. of observations                    | 1648                     | 1648                     | 1648                    |
| R <sup>2</sup>                         | 0.35                     | 0.38                     | 0.36                    |
| Hausman test                           |                          | 42.39***                 | 24.60**                 |

\*. \*\*. \*\*\*, Coefficient is statistically significant at the 10%, 5%, and 1% level, respectively. The model in column 1 is based on comparisons of plots both within and between households. Columns 2 and 3 are based on comparisons of plots within households (household fixed effects). The dependent variable in all three models is cotton profit in Indian Rupees (Rs) per acre. Coefficient estimates are shown with SEs in parentheses. The reference year is 2002. The Hausman test results show that fixed-effects are preferred over random-effects specifications.

**Table S4. Estimated coefficients of household consumption expenditure function**

| Explanatory variables     | Pooled-data model        | Fixed-effects model     |
|---------------------------|--------------------------|-------------------------|
|                           | 1                        | 2                       |
| Bt area (acres)           | 2,636.22*** (925.83)     | 197.65 (1,227.07)       |
| Bt area 2006–2008 (acres) | 428.85 (973.06)          | 2,825.65** (1,196.64)   |
| Cotton area (acres)       | 104.81 (69.19)           | 41.55 (74.10)           |
| Cultivated area (acres)   | 1,374.32*** (147.68)     | 1,123.82*** (229.72)    |
| Household size (AE)       | 13,735.91*** (807.15)    | 9,255.51*** (1,259.57)  |
| Age of farmer (y)         | 564.98*** (134.82)       |                         |
| Education of farmer (y)   | 1,832.08*** (344.70)     |                         |
| Karnataka                 | –2,048.50 (4,211.89)     |                         |
| Andhra Pradesh            | 35,430.50*** (4,283.91)  |                         |
| Tamil Nadu                | 39,745.87*** (7,346.99)  |                         |
| 2004                      | 14,234.28*** (4,556.09)  | 19,433.01*** (4,543.11) |
| 2006                      | –406.97 (5,179.06)       | 1,257.58 (5,653.66)     |
| 2008                      | 3,957.18 (5,237.25)      | 9,250.43 (5,937.91)     |
| Constant                  | –58,234.18*** (8,787.57) | 15,250.02** (6,663.66)  |
| No. of observations       | 1,431                    | 1,431                   |
| R <sup>2</sup>            | 0.43                     | 0.17                    |
| Hausman test              |                          | 35.50***                |

\*\*\* \*\*, Coefficient is statistically significant at the 5% and 1% level, respectively. The model in column 1 is based on comparisons within and between households. Column 2 is based on comparisons within households (household fixed effects). The dependent variable in both models is annual household consumption expenditures in Indian Rupees. Household expenditures were deflated using the consumer price index. Coefficient estimates are shown with SEs in parentheses. The reference year is 2002. AE, adult equivalents.
